# Supplementary material
Source: PubMed Central journal article supplement (PMC3160247)

## Supplementary Information

| Bacterium             | Phylum                 | Arrangement of flagella | Tilt-series showing flagella | Sub-tomograms averaged | Pixel size (nm) | Resolution (FSC 0.5) (nm) |
|-----------------------|------------------------|-------------------------|------------------------------|------------------------|-----------------|---------------------------|
| <i>A. longum</i>      | Firmicutes             | >1, lateral             | 22                           | 35                     | 1.9             | 8.4                       |
| <i>B. burgdorferi</i> | Spirochetes            | 5 to 8 each tip         | 46                           | 43                     | 1.3             | 5.0                       |
| <i>T. primitia</i>    | Spirochetes            | 1 each tip              | 19                           | 20                     | 1.9             | 7.7                       |
| <i>H. hepaticus</i>   | Epsilon-proteobacteria | 1 each tip              | 67                           | 60                     | 1.3             | 5.0                       |
| <i>C. jejuni</i>      | Epsilon-proteobacteria | 1 each tip              | 30                           | 15                     | 1.9             | 6.4                       |
| <i>H. gracilis</i>    | Beta-proteobacteria    | 1 to 4 each tip         | 29                           | 94                     | 1.3             | 5.9                       |
| <i>V. cholerae</i>    | Gamma-proteobacteria   | 1, polar                | 50                           | 16                     | 1.9             | 8.3                       |
| <i>S. enterica</i>    | Gamma-proteobacteria   | >1, lateral             | 72                           | 83                     | 1.3             | 4.8                       |
| <i>E. coli</i>        | Gamma-proteobacteria   | >1, lateral             | 61                           | 46                     | 1.3             | 5.9                       |
| <i>C. crescentus</i>  | Alpha-proteobacteria   | 1, polar                | 82                           | 30                     | 1.3             | 5.9                       |
| <i>H. neptunium</i>   | Alpha-proteobacteria   | 1, polar                | 31                           | 27                     | 1.5             | 6.8                       |

**Table S1.** Summary of the 11 different bacterial flagellar motors.

| <b>FAMILY</b> |                                | <i>A. longum</i>        | <i>B. burgdorferi</i>       | <i>T. primitia</i>                                            | <i>H. hepaticus</i> | <i>C. jejuni</i> |
|---------------|--------------------------------|-------------------------|-----------------------------|---------------------------------------------------------------|---------------------|------------------|
| <b>fliF</b>   | MS ring                        | ALO_14062               | NP_212425.1                 | jcvi:TREPR_2558.1                                             | NP_860142.1         | YP_001481871.1   |
| <b>fliG</b>   | C ring                         | ALO_14067;<br>ALO_11609 | NP_212355.1;<br>NP_212424.1 | jcvi:TREPR_1015.1;<br>jcvi:TREPR_2557.1                       | NP_860141.1         | YP_001481872.1   |
| <b>fliM</b>   |                                | ALO_14127               | NP_212412.1                 | jcvi:TREPR_3134.1;<br>jcvi:TREPR_2856.1;<br>jcvi:TREPR_1885.1 | NP_860678.1         | YP_001481630.1   |
| <b>fliN</b>   |                                | ALO_14202               | NP_212411.1                 | -                                                             | NP_861108.1         | YP_001481904.1   |
| <b>fliY</b>   | Occasional C ring component    | ALO_14132               | -                           | jcvi:TREPR_2855.1                                             | NP_860679.1         | YP_001481629.1   |
| <b>fliI</b>   | Soluble Export Apparatus       | ALO_14077               | NP_212422.1                 | jcvi:TREPR_2555.1                                             | NP_860096.1         | YP_001481760.1   |
| <b>fliH</b>   |                                | ALO_14072               | NP_212423.1                 | jcvi:TREPR_2556.1                                             | NP_860140.1         | YP_001481873.1   |
| <b>fliJ</b>   |                                | ALO_14082               | -                           | jcvi:TREPR_2554.1                                             | -                   | -                |
| <b>flhA</b>   | Transmembrane Export Apparatus | ALO_14167               | NP_212405.1                 | jcvi:TREPR_3866.1;<br>jcvi:TREPR_2849.1                       | NP_859998.1         | YP_001482396.1   |
| <b>flhB</b>   |                                | ALO_14162               | NP_212406.1                 | jcvi:TREPR_2850.1                                             | NP_860549.1         | YP_001481888.1   |
| <b>fliP</b>   |                                | ALO_14147               | NP_212409.1                 | jcvi:TREPR_2853.1                                             | NP_860223.1         | YP_001482343.1   |

Table S2. Hand-curated flagellar motor gene families for the 11 organisms.

|             |                                         |           |             |                   |             |                                   |
|-------------|-----------------------------------------|-----------|-------------|-------------------|-------------|-----------------------------------|
| <b>fliR</b> | Transmembrane Export Apparatus          | ALO_14157 | NP_212407.1 | jcvi:TREPR_2851.1 | NP_860235.1 | YP_001482699.1                    |
| <b>fliQ</b> |                                         | ALO_14152 | NP_212408.1 | jcvi:TREPR_2852.1 | NP_859969.1 | YP_001483150.1                    |
| <b>fliO</b> |                                         | -         | -           | -                 | NP_861109.1 | YP_001481905.1                    |
| <b>fliE</b> | Proximal Rod                            | ALO_14057 | NP_212426.1 | jcvi:TREPR_2559.1 | NP_860940.1 | YP_001482063.1                    |
| <b>flgB</b> |                                         | ALO_14047 | NP_212428.1 | jcvi:TREPR_2561.1 | NP_860938.1 | YP_001482065.1                    |
| <b>flgC</b> |                                         | ALO_14052 | NP_212427.1 | jcvi:TREPR_2560.1 | NP_860939.1 | YP_001482064.1                    |
| <b>flgF</b> |                                         | ALO_10009 | NP_212909.1 | jcvi:TREPR_3479.1 | NP_860621.1 | YP_001482240.1                    |
| <b>flgG</b> | Distal rod                              | ALO_10014 | NP_212908.1 | jcvi:TREPR_3480.1 | NP_860612.1 | YP_001482241.1                    |
| <b>flgI</b> | P-ring                                  | ALO_10029 | NP_212906.1 | -                 | NP_859673.1 | YP_001482943.1                    |
| <b>flgH</b> | L-ring                                  | ALO_10024 | -           | -                 | NP_860430.1 | YP_001482231.1                    |
| <b>motA</b> | Stator                                  | ALO_08815 | NP_212415.1 | jcvi:TREPR_2861.1 | NP_860032.1 | YP_001481890.1                    |
| <b>motB</b> |                                         | ALO_08810 | NP_212414.1 | jcvi:TREPR_2860.1 | NP_860033.1 | YP_001482137.1;<br>YP_001481889.1 |
| <b>motX</b> |                                         | -         | -           | -                 | -           | -                                 |
| <b>motY</b> |                                         | -         | -           | -                 | -           | -                                 |
| <b>flbB</b> | Proposed Spirochaete P-collar component | -         | NP_212420.1 | jcvi:TREPR_2866.1 | -           | -                                 |

Table S2 (continued). Hand-curated flagellar motor gene families for the 11 organisms.

| <i>H. gracilis</i> | <i>V. cholerae</i> | <i>S. enterica</i> | <i>E. coli</i> | <i>C. crescentus</i>        | <i>H. neptunium</i>         |
|--------------------|--------------------|--------------------|----------------|-----------------------------|-----------------------------|
| HGR_14229          | NP_231764.1        | NP_460922.1        | NP_416448.1    | NP_419721.2                 | YP_758973.1                 |
| HGR_14234          | NP_231763.1        | NP_460923.1        | NP_416449.1    | NP_419722.1                 | YP_760109.1;<br>YP_758977.1 |
| HGR_14264          | NP_231757.1        | NP_460929.1        | NP_416455.1    | NP_420864.1                 | YP_758983.1                 |
| HGR_14269          | NP_231756.1        | NP_460930.1        | NP_416456.1    | NP_420978.1;<br>NP_419724.1 | YP_760111.1;<br>YP_758975.1 |
| -                  | -                  | -                  | -              | -                           | -                           |
| HGR_14244          | NP_231761.1        | NP_460925.1        | NP_416451.1    | NP_421834.1                 | YP_758999.1                 |
| HGR_14239          | NP_231762.1        | NP_460924.1        | NP_416450.2    | NP_419723.1                 | -                           |
| HGR_14249          | NP_231760.1        | NP_460926.1        | NP_416452.1    | NP_421835.1                 | -                           |
| HGR_16580          | NP_231701.1        | NP_460870.1        | NP_416393.1    | NP_419726.1                 | YP_759004.1                 |
| HGR_16585          | NP_231751.1        | NP_460871.1        | NP_416394.1    | NP_419893.1                 | YP_759006.1                 |
| HGR_14279          | NP_231754.1        | NP_460932.1        | NP_416458.1    | NP_419767.1                 | YP_758976.1                 |

Table S2 (continued). Hand-curated flagellar motor gene families for the 11 organisms.

|           |                             |             |             |             |                             |
|-----------|-----------------------------|-------------|-------------|-------------|-----------------------------|
| HGR_14289 | NP_231752.1                 | NP_460934.1 | NP_416460.1 | NP_419892.1 | YP_759005.1                 |
| HGR_14284 | NP_231753.1                 | NP_460933.1 | NP_416459.1 | NP_419891.1 | YP_759003.1                 |
| HGR_14274 | NP_231755.1                 | NP_460931.1 | NP_416457.4 | NP_419768.1 | -                           |
| HGR_14224 | NP_231765.2                 | NP_460921.1 | NP_416447.1 | NP_419771.1 | YP_759002.1                 |
| HGR_16635 | NP_231831.1;<br>NP_231831.1 | NP_460145.1 | NP_415591.1 | NP_419769.1 | YP_759000.1                 |
| HGR_16640 | NP_231830.1                 | NP_460146.1 | NP_415592.1 | NP_419770.1 | YP_759001.1                 |
| HGR_16655 | NP_231827.1                 | NP_460149.1 | NP_415595.1 | NP_420866.1 | YP_758986.1                 |
| HGR_16660 | NP_231826.1                 | NP_460150.1 | NP_415596.1 | NP_420867.1 | YP_758987.1                 |
| HGR_16670 | NP_231824.1                 | NP_460152.1 | NP_415598.3 | NP_421384.1 | YP_758978.1                 |
| HGR_16665 | NP_231825.1                 | NP_460151.1 | NP_415597.1 | NP_420869.1 | YP_758989.1                 |
| HGR_16605 | NP_230539.1                 | NP_460880.1 | NP_416404.1 | NP_419567.1 | YP_762020.1;<br>YP_758984.1 |
| HGR_16600 | NP_230540.1                 | NP_460879.1 | NP_416403.1 | NP_420384.1 | YP_759621.1;<br>YP_758982.1 |
| -         | NP_232229.1                 | -           | -           | -           | -                           |
| -         | NP_230654.1                 | -           | -           | -           | -                           |
| -         | -                           | -           | -           | -           | -                           |

Table S2 (continued). Hand-curated flagellar motor gene families for the 11 organisms.

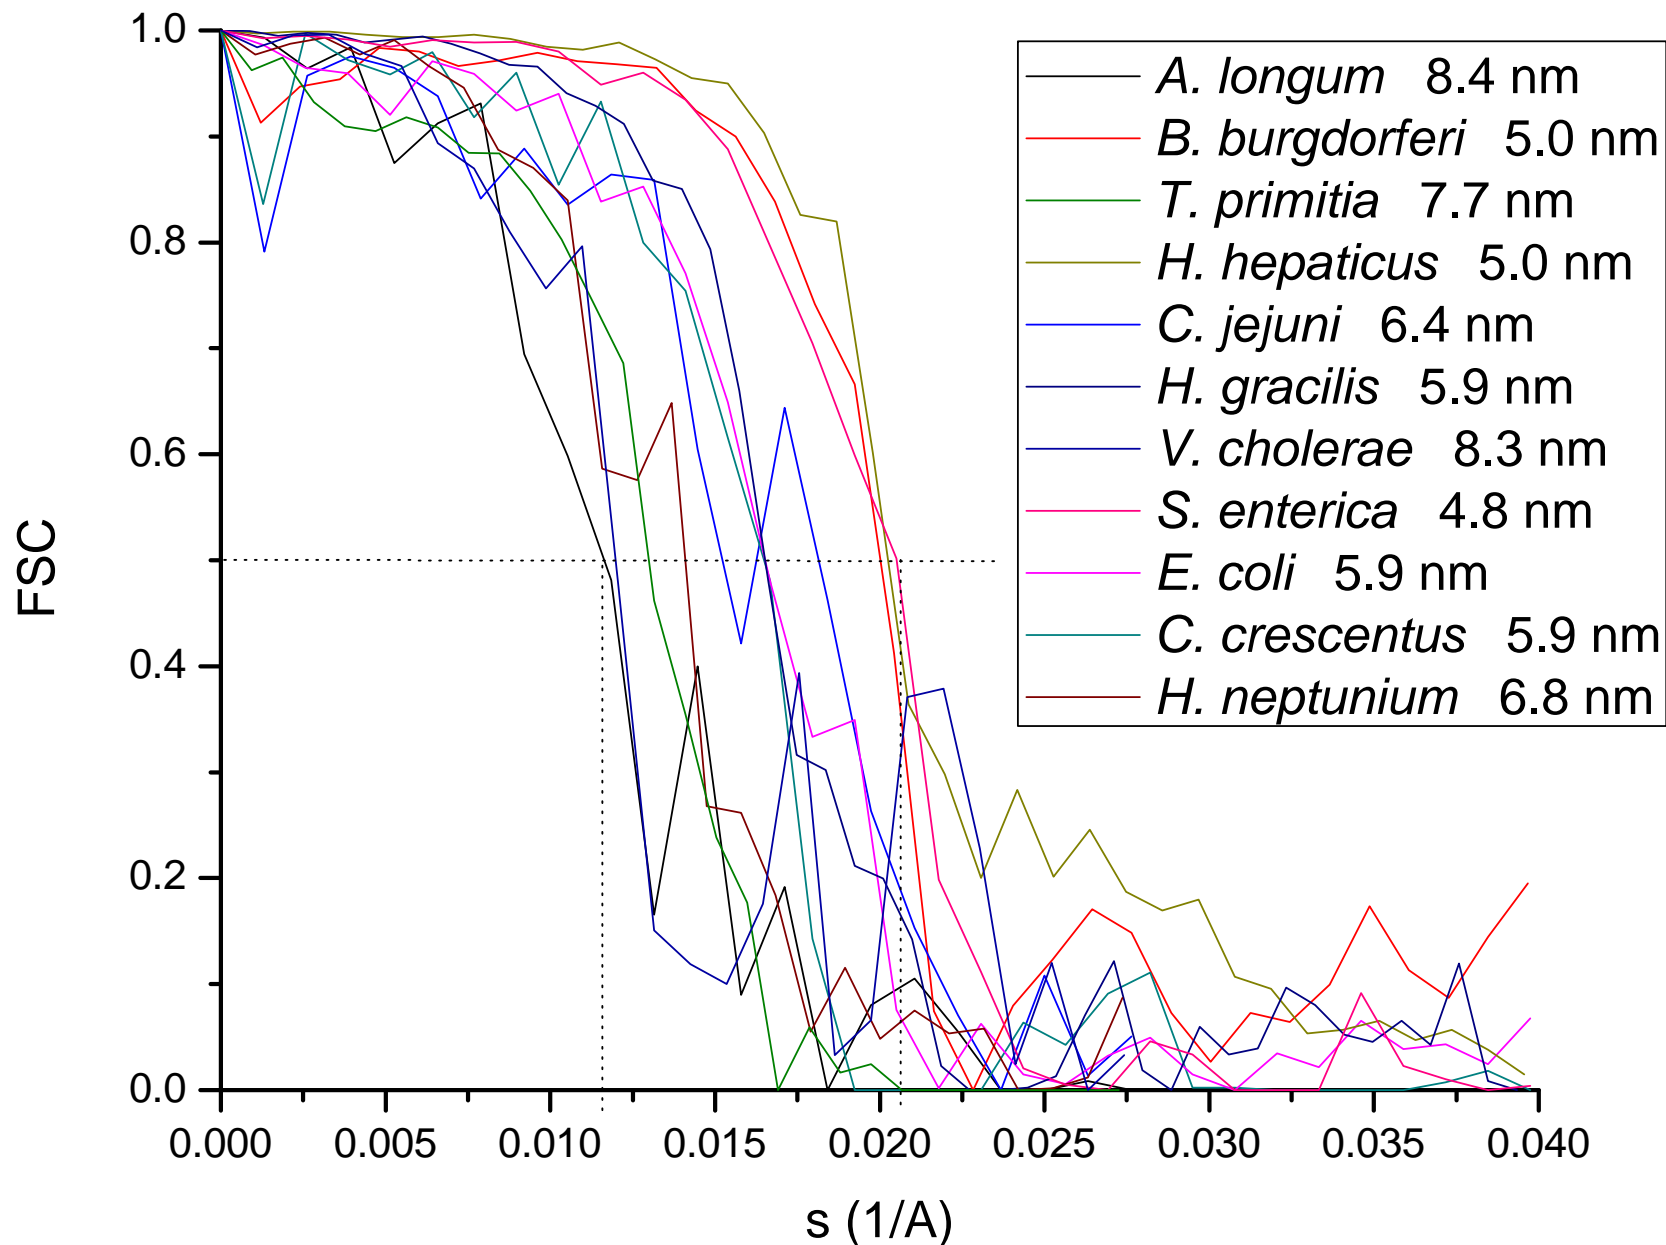

Figure S1. Fourier Shell Correlation (FSC) curves for the 11 flagellar motor subtomograms, calculated by comparing separately averaged and symmetrized halves of the data set.

**Figure S2.** Phylogenetic tree of 603 representative bacteria constructed by concatenation of multiple ribosomal protein genes as described previously (Briegel et al, 2009). Organisms imaged in this study are marked with red asterisks. The presence or absence of known flagellar motor genes (listed at top) is indicated by black or open cells, respectively, in concentric rings surrounding the tree. Note that this figure is enlargeable.

### References

Briegel A, Ortega DR, Tocheva EI, Wuichet K, Li Z, Chen SY, Muller A, Iancu CV, Murphy GE, Dobro MJ, Zhulin IB, Jensen GJ (2009) Universal architecture of bacterial chemoreceptor arrays. *Proc Natl Acad Sci U S A* **106**: 17181-17186



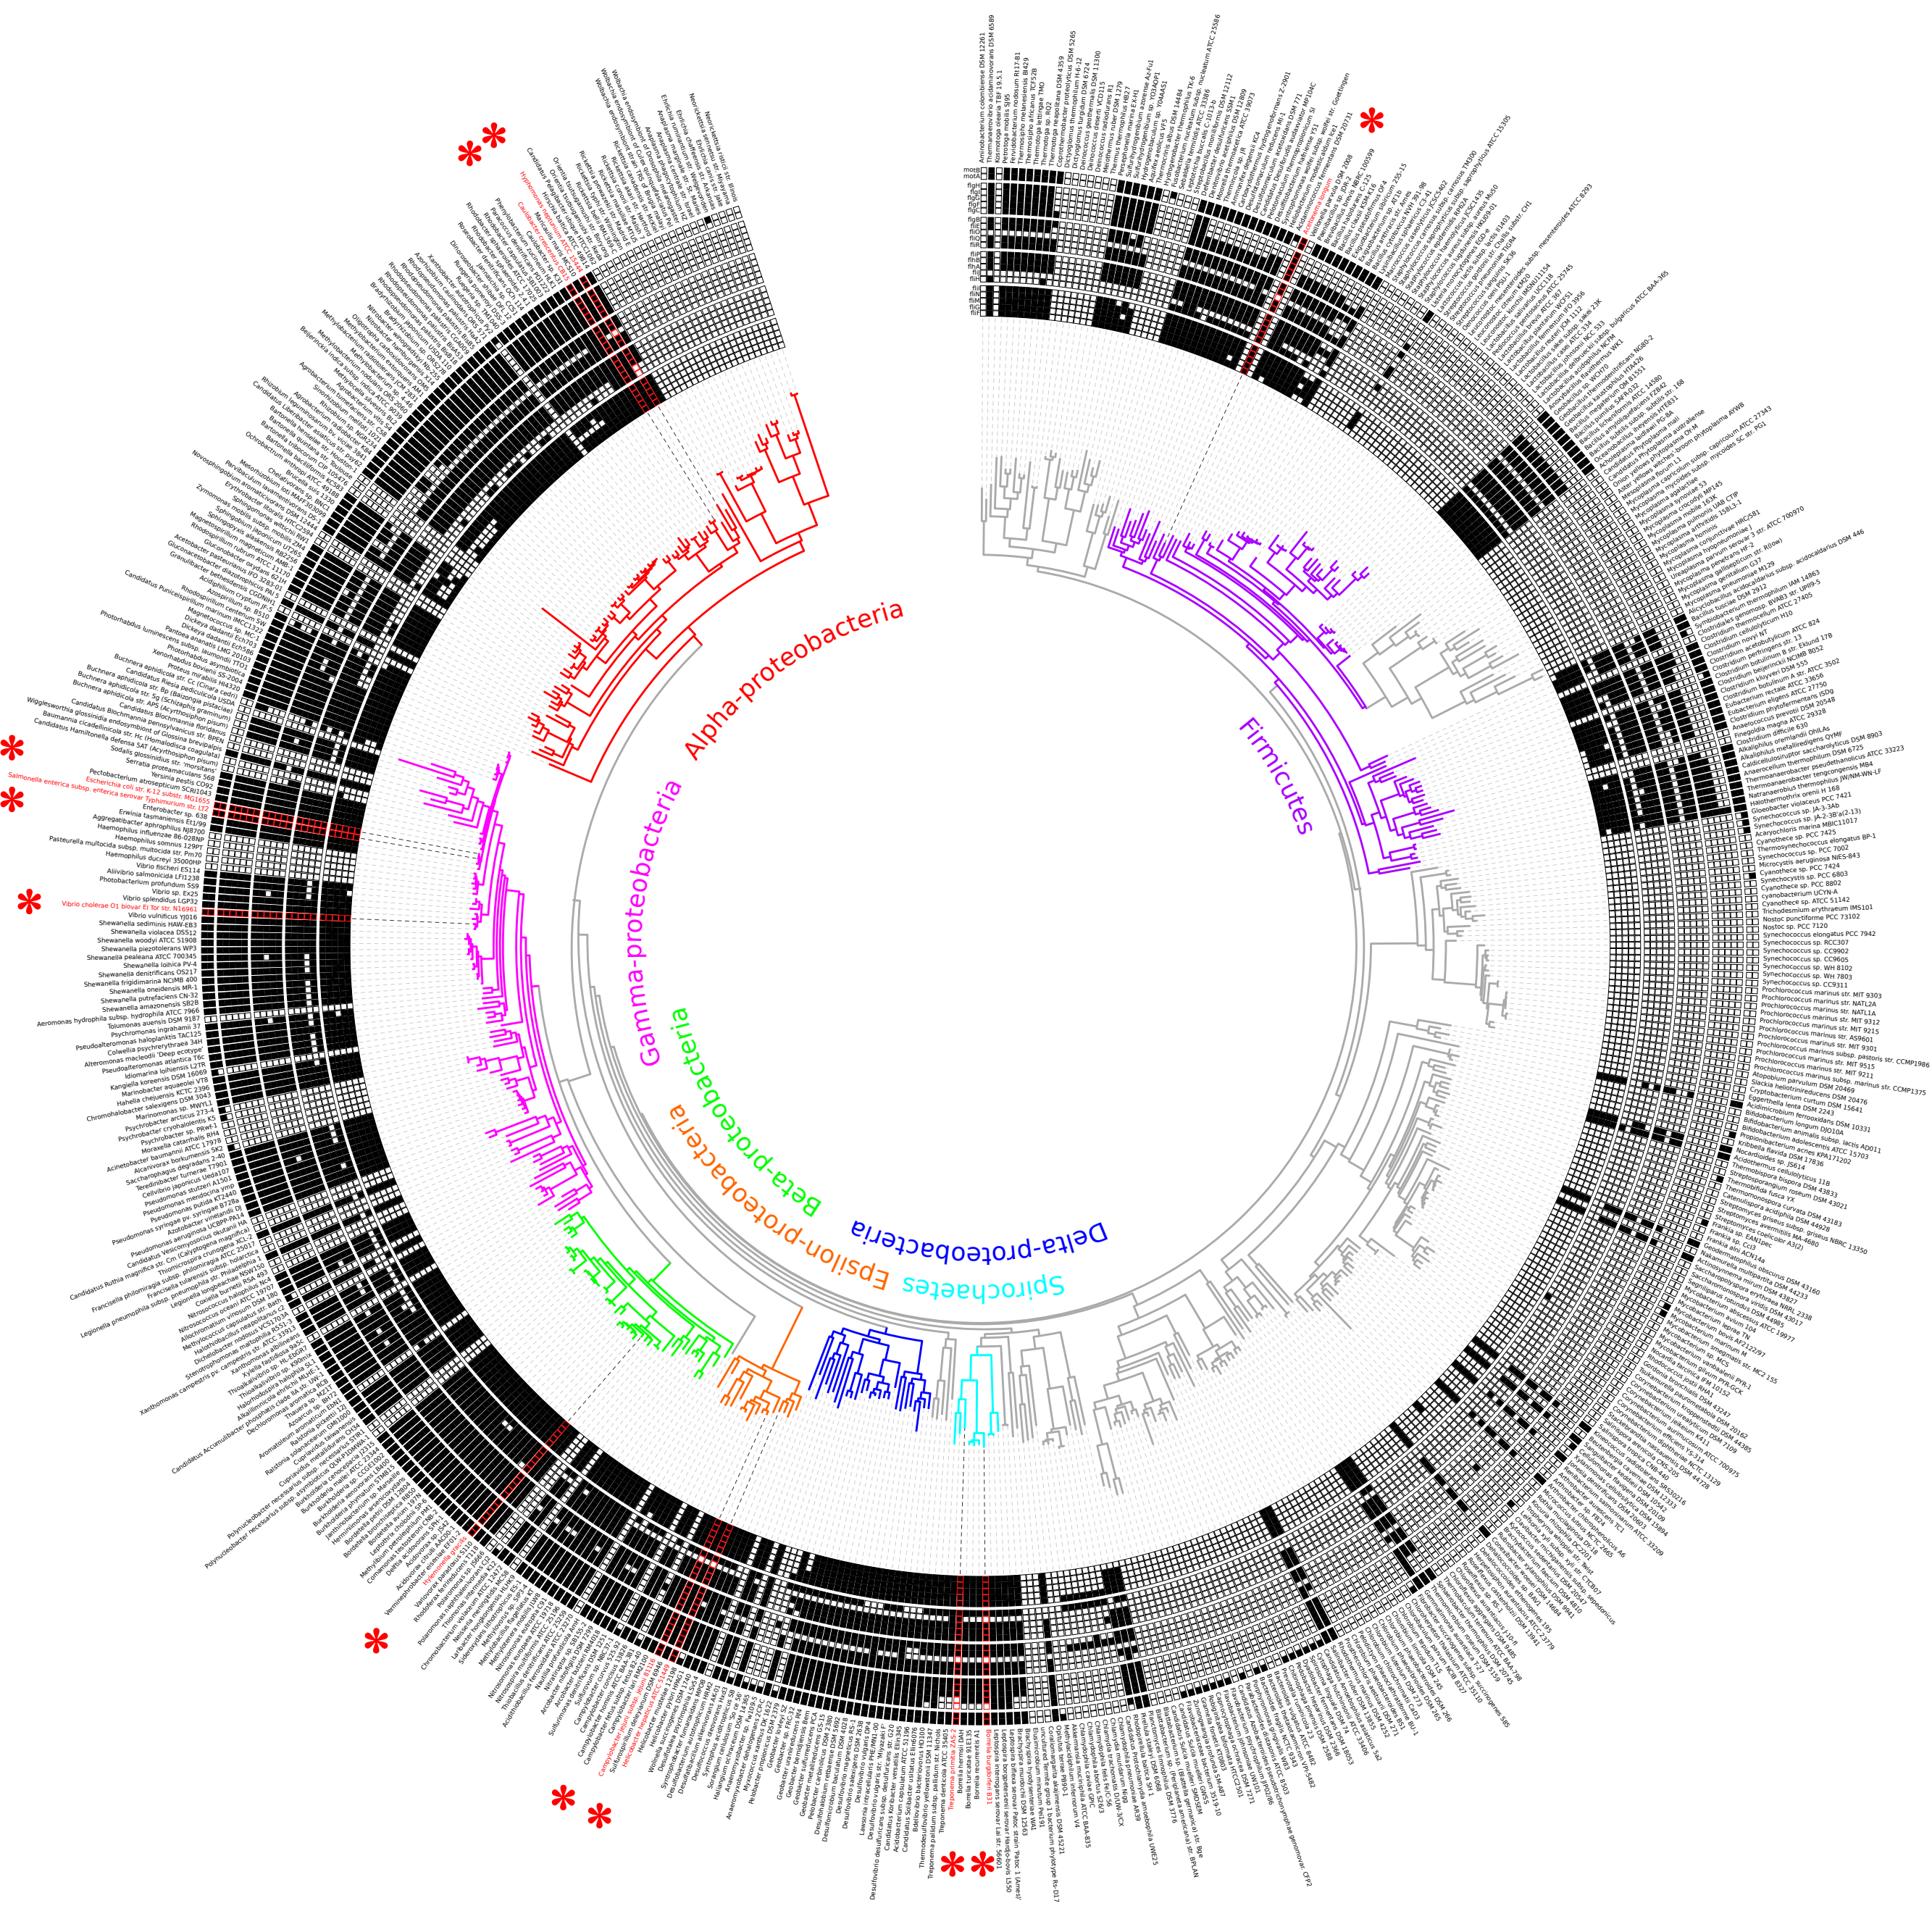

Supplement: emboj2011186s1.pdf [file emboj2011186s1.pdf]
